# Supplementary material
Source: PubMed Central journal article supplement (PMC6188526)
Supplement: ocy095_supp.pdf [file ocy095_supp.pdf]

## SUPPLEMENTARY MATERIALS

### Exhibit 1. SQL script for medication matching adjudication loop

```

/*****

PURPOSE: LINK PRESCRIBED TO DISPENSED MEDICATION RECORDS FROM PCORnet COMMON DATA MODEL TABLES
AUTHOR: PEDRO RIVERA (riverap@ochin.org)
DATE: 11/18/2017
DETAILS: MATCH RECORDS ON PATID AND PHARMACEUTICAL SUBCLASS, NEAREST IN DATE WHERE ORDER_DATE
<= DISPENSE_DATE

INPUT TABLES:
  - dbo.ORDERED = prescribed meds table. Nomenclature=RxNorm_CUI
  - dbo.DISPENSED = dispensed meds table. Nomenclature=NDC
  - dbo.RXNORM_NDC_XWALK = CROSSWALK BETWEEN RXNORM_CUI AND NDC TERMINOLOGIES CREATED
USING RxMIX WEB APP (https://mor.nlm.nih.gov/RxMix/)

OUTPUT:
  - dbo.ORDERED = updated with DISP_ID column, indicating ID of matched dispensing record
  - dbo.DISPENSED = updated with MATCH_RX column, flag indicating this record matched a
prescription
*****/

/*****
--- 1. SET UP TABLES FOR ADJUDICATION: ADD COLUMNS AND SORT
*****/

--Add additional columns for adjudication
ALTER TABLE [dbo].[ORDERED] ADD ORD_SEQ BIGINT
ALTER TABLE [dbo].[ORDERED] ADD DISP_ID BIGINT
ALTER TABLE [dbo].[DISPENSED] ADD DISP_ID BIGINT
alter table [dbo].[DISPENSED] ADD MATCH_RX BIT

update [dbo].[ORDERED] set disp_id = null
update [dbo].[ORDERED] set ord_seq = null
update [dbo].[DISPENSED] set DISP_ID = null
update [dbo].[DISPENSED] set MATCH_RX = null

--Create sequential Rx ID for each patient's Rx history. This will be used as an index to
iterate through prescriptions
SELECT PRESCRIBINGID, PATID,
ORD_SEQ = ROW_NUMBER() OVER (PARTITION BY PATID ORDER BY rx_order_date ASC)
INTO #RxSeq
FROM [dbo].[ORDERED]

UPDATE o
SET o.ORD_SEQ = s.ORD_SEQ
FROM [dbo].[ORDERED] o
INNER JOIN #RxSeq s ON s.PRESCRIBINGID = o.PRESCRIBINGID

DROP TABLE #RxSeq

-- Sort dispensing records by ascending dispense date
SELECT DISPENSINGID, DISP_ID = ROW_NUMBER() OVER (ORDER BY dispense_date ASC)

```

```

INTO #DispSeq
FROM [dbo].[DISPENSED]

UPDATE d
SET d.DISP_ID = s.DISP_ID
FROM [dbo].[DISPENSED] d
INNER JOIN #DispSeq s ON s.DISPENSINGID = d.DISPENSINGID

DROP TABLE #DispSeq

/*****
--- 2. RUN THE LOOP TO FIND CLOSEST DISPENSE DATE ON OR AFTER EACH ORDERED DATE, WITHIN PATID
AND PHARM_SUBCLASS
*****/

SET NOCOUNT ON;
DECLARE @PROCESS_SEQ INT

DECLARE CurRxSeq CURSOR FAST_FORWARD READ_ONLY
FOR
    SELECT DISTINCT ORD_SEQ -- Cycle through each
    FROM [dbo].[ORDERED]
    ORDER BY ORD_SEQ

OPEN CurRxSeq

    FETCH NEXT FROM CurRxSeq INTO @PROCESS_SEQ

    WHILE @@FETCH_STATUS = 0
        BEGIN

            UPDATE rx1
            SET rx1.DISP_ID = ord.MATCH_DISP_ID
            FROM [dbo].[ORDERED] rx1
            INNER JOIN (
                SELECT
                rx.PRESCRIBINGID, MIN(dsp.DISP_ID) AS
                MATCH_DISP_ID -- Closest Disp
                FROM [dbo].[DISPENSED] dsp
                INNER JOIN [dbo].[RXNORM_NDC_XWALK] x ON x.NDC =
                dsp.NDC
                INNER JOIN [dbo].[ORDERED] rx
                ON rx.PATID = dsp.PATID -- Match on Patient ID
                AND rx.PHARM_SUBCLASS_C =
                x.PHARM_SUBCLASS_C -- and pharmacy subclass
                AND rx.rx_order_date <= dsp.dispense_date -
                - Dispense date on or after ordered date
                WHERE rx.ORD_SEQ = @PROCESS_SEQ -- Loop through Rx
                sequence
                AND dsp.MATCH_RX IS NULL -- Has not yet been
                adjudicated
                GROUP BY rx.PRESCRIBINGID ) ord
            ON ord.PRESCRIBINGID = rx1.PRESCRIBINGID

            -- Flag dispensed record as already adjudicated to avoid remapping it
            UPDATE d
            SET d.MATCH_RX = 1
            FROM [dbo].[DISPENSED] d
            INNER JOIN [dbo].[ORDERED] o ON d.DISP_ID = o.DISP_ID

```

```
WHERE o.ORD_SEQ = @PROCESS_SEQ
```

```
FETCH NEXT FROM CurRxSeq INTO @PROCESS_SEQ
```

```
END
```

```
CLOSE CurRxSeq
```

```
DEALLOCATE CurRxSeq
```

```
/***/
```

**Table 1. Sensitivity analysis: dispensing percentages in subpopulations**

|                                                     | Full sample | Excluding aspirin | Excluding patients ever uninsured in study period | Excluding Hispanic patients | Excluding patients with only one visit |
|-----------------------------------------------------|-------------|-------------------|---------------------------------------------------|-----------------------------|----------------------------------------|
| <b>Cardiovascular drugs, total</b>                  | 76.0%       | --                | 79.1%                                             | 78.3%                       | 76.3%                                  |
| ACEs, ARBs, and DRIs                                | 75.7%       | --                | 79.5%                                             | 78.4%                       | 76.0%                                  |
| Statins                                             | 76.6%       | --                | 80.1%                                             | 80.0%                       | 76.9%                                  |
| Diuretics                                           | 77.9%       | --                | 80.4%                                             | 76.4%                       | 78.1%                                  |
| Beta Blockers                                       | 79.2%       | --                | 82.0%                                             | 80.2%                       | 79.4%                                  |
| Platelet Inhibitors                                 | 67.6%       | 74.9%             | 68.7%                                             | 69.4%                       | 67.7%                                  |
| Calcium Channel Blockers: Dihydropyridine, oral     | 77.4%       | --                | 79.6%                                             | 78.0%                       | 77.7%                                  |
| Other Dyslipidemia Drugs                            | 73.4%       | --                | 77.3%                                             | 76.4%                       | 73.6%                                  |
| Antianginals                                        | 78.0%       | --                | 80.5%                                             | 79.9%                       | 78.2%                                  |
| Calcium Channel Blockers: Non-Dihydropyridine, oral | 78.3%       | --                | 80.9%                                             | 77.8%                       | 78.3%                                  |
| <b>Diabetes drugs, total</b>                        | 74.4%       | --                | 78.7%                                             | 77.6%                       | 74.7%                                  |
| Miscellaneous Antidiabetic Agents (Metformin)       | 74.9%       | --                | 79.5%                                             | 78.5%                       | 75.2%                                  |
| Insulins                                            | 74.6%       | --                | 78.3%                                             | 77.0%                       | 74.8%                                  |
| Sulfonylureas                                       | 74.9%       | --                | 80.2%                                             | 79.0%                       | 75.1%                                  |
| DPP-4 Inhibitors                                    | 65.9%       | --                | 69.4%                                             | 70.8%                       | 66.0%                                  |
| Thiazolidinediones                                  | 80.4%       | --                | 84.0%                                             | 81.7%                       | 80.5%                                  |
| SGLT2 Inhibitors                                    | 55.6%       | --                | 60.0%                                             | 56.9%                       | 55.6%                                  |
| GLP-1 Receptor Agonists                             | 62.8%       | --                | 62.2%                                             | 62.6%                       | 62.9%                                  |

**Table 2. Dispensing percentages and odds of dispense by patient-, encounter-, and facility-level factors**

|                                      | % dispensed | Odds of dispense (95% CI) |
|--------------------------------------|-------------|---------------------------|
| Patient-level factors                |             |                           |
| Sex                                  |             |                           |
| Female                               | 76.3%       | <b>1.14 (1.09, 1.20)</b>  |
| Male                                 | 74.2%       | Ref                       |
| Age                                  |             |                           |
| 20-39                                | 73.7%       | ref                       |
| 40-54                                | 74.8%       | <b>1.12 (1.04, 1.21)</b>  |
| 55-64                                | 76.3%       | <b>1.20 (1.11, 1.29)</b>  |
| Race/ethnicity                       |             |                           |
| Hispanic                             | 67.5%       | <b>0.49 (0.46, 0.53)</b>  |
| Non-Hispanic white                   | 81.2%       | Ref                       |
| Non-Hispanic black                   | 72.1%       | <b>0.87 (0.79, 0.96)</b>  |
| Non-Hispanic other                   | 76.1%       | <b>0.79 (0.69, 0.90)</b>  |
| Missing/unknown                      | 77.8%       | --                        |
| FPL                                  |             |                           |
| ≤138%                                | 75.3%       | <b>1.42 (1.32, 1.53)</b>  |
| >138%                                | 71.4%       | ref                       |
| Missing/unknown                      | 81.9%       | --                        |
| Urbanicity                           |             |                           |
| Urban                                | 75.1%       | ref                       |
| Small town/rural                     | 71.6%       | 0.89 (0.79, 1.01)         |
| Missing/unknown                      | 80.6%       | --                        |
| Insurance                            |             |                           |
| Medicaid only                        | 81.3%       | ref                       |
| Medicare only                        | 78.1%       | <b>0.75 (0.69, 0.81)</b>  |
| Private only                         | 73.9%       | <b>0.64 (0.58, 0.70)</b>  |
| Multiple types                       | 75.1%       | <b>0.82 (0.74, 0.90)</b>  |
| Partial uninsured                    | 66.4%       | <b>0.50 (0.47, 0.54)</b>  |
| Newly insured in 2014                |             |                           |
| No                                   | 77.4%       | ref                       |
| Yes                                  | 68.7%       | <b>0.68 (0.64, 0.72)</b>  |
| Primary care provider (PCP) assigned |             |                           |
| No                                   | 75.4%       | ref                       |
| Yes                                  | 70.0%       | <b>2.07 (1.42, 3.00)</b>  |
| % visits with PCP                    |             |                           |
| ≤25%                                 | 68.8%       | ref                       |
| 26-50%                               | 74.6%       | <b>1.40 (1.27, 1.56)</b>  |
| 51-75%                               | 76.9%       | <b>1.63 (1.48, 1.80)</b>  |
| 75-100%                              | 75.5%       | <b>1.49 (1.36, 1.64)</b>  |
| State of residence                   |             |                           |
| Medicaid expansion (2014)            | 78.2%       | <b>3.04 (1.36, 6.78)</b>  |
| Non-expansion state (through 2015)   | 59.9%       | ref                       |
| Charlson comorbidity score           |             |                           |
| 0-2                                  |             | ref                       |
| 3-4                                  |             |                           |
| 5-7                                  |             |                           |
| ≥8                                   |             |                           |

|                                      |       |                          |
|--------------------------------------|-------|--------------------------|
| Hypertension on problem list         |       |                          |
| No                                   | 73.3% | ref                      |
| Yes                                  | 75.9% | <b>1.21 (1.14, 1.28)</b> |
| Lipid disorder on problem list       |       |                          |
| No                                   | 72.8% | ref                      |
| Yes                                  | 76.1% | <b>1.17 (1.11, 1.24)</b> |
| Length of time with DM/pre-DM        |       |                          |
| ≤1 yr                                | 72.6% | ref                      |
| 2-3 yr                               | 74.5% | <b>1.07 (1.01, 1.15)</b> |
| 4-5 yr                               | 79.6% | <b>1.19 (1.10, 1.30)</b> |
| ≥6 yr                                | 75.6% | <b>1.13 (1.01, 1.27)</b> |
| Encounter-level factors              |       |                          |
| Medication class                     |       |                          |
| DM med                               | 74.4% | ref                      |
| CVD med                              | 76.0% | 1.01 (0.99, 1.02)        |
| Encounter type                       |       |                          |
| Ambulatory visit                     | 71.8% | ref                      |
| Other ambulatory                     | 78.6% | <b>1.02 (1.01, 1.34)</b> |
| Provider type (visit provider)       |       |                          |
| MD                                   | 77.4% | ref                      |
| PA/NP                                | 73.3% | <b>0.97 (0.94, 0.99)</b> |
| Other                                | 73.9% | <b>0.95 (0.93, 0.97)</b> |
| Prescribing provider is PCP          |       |                          |
| No                                   | 72.3% | ref                      |
| Yes                                  | 76.0% | <b>1.11 (1.08, 1.14)</b> |
| E-prescribed                         |       |                          |
| No                                   | 66.6% | ref                      |
| Yes                                  | 77.1% | <b>1.18 (1.14, 1.22)</b> |
| Refill                               |       |                          |
| No                                   | 73.1% | ref                      |
| Yes                                  | 75.7% | <b>1.03 (1.01, 1.04)</b> |
| DM encounter                         |       |                          |
| No                                   | 74.4% | ref                      |
| Yes                                  | 71.2% | 0.98 (0.96, 1.00)        |
| Hypertension encounter               |       |                          |
| No                                   | 72.4% | ref                      |
| Yes                                  | 73.2% | 1.02 (0.99, 1.05)        |
| Lipid encounter                      |       |                          |
| No                                   | 72.4% | ref                      |
| Yes                                  | 74.7% | <b>1.04 (1.00, 1.09)</b> |
| N encs at same facility in past year |       |                          |
| 0                                    | 72.3% | ref                      |
| 1-2                                  | 71.4% | 0.96 (0.93, 1.00)        |
| 3-5                                  | 74.5% | 0.99 (0.95, 1.02)        |
| ≥6                                   | 78.5% | 0.97 (0.93, 1.01)        |
| Facility-level factors               |       |                          |
| Clinic type/specialty                |       |                          |
| Primary care/family practice         | 75.3% | Ref                      |
| Other                                | 79.2% | 0.93 (0.82, 1.07)        |
| Clinic size: N providers             |       |                          |
| Q1 (1st-25th percentile)             | 67.2% | Ref                      |
| Q2                                   | 79.2% | <b>1.23 (1.13, 1.33)</b> |
| Q3                                   | 76.0% | <b>1.13 (1.05, 1.21)</b> |

|                            |       |                          |
|----------------------------|-------|--------------------------|
| Q4                         | 79.2% | <b>1.12 (1.03, 1.21)</b> |
| Length of time on EHR      |       |                          |
| <2 years                   | 72.7% | ref                      |
| 2-5 years                  | 74.2% | <b>1.18 (1.07, 1.30)</b> |
| >5 years                   | 77.2% | <b>1.19 (1.09, 1.31)</b> |
| Meaningful Use attestation |       |                          |
| No                         | 72.6% | ref                      |
| Yes                        | 75.4% | <b>1.36 (1.20, 1.53)</b> |

Odds ratios and 95% CIs from GEE models with a logit link; robust standard error estimator applied to account for repeated measures within patients and patients nested within health centers. All models adjusted for sex, age group, and race/ethnicity. FPL predictor model restricted to facilities with sufficient variation for model conversion. **BOLD**=odds ratio statistically different from 1.0.
